# Supplementary material
Source: HighWire-hosted journal article supplement (https://openres.ersjournals.com/content/5/2/00134-2018)

Sensor 1 Patient 1

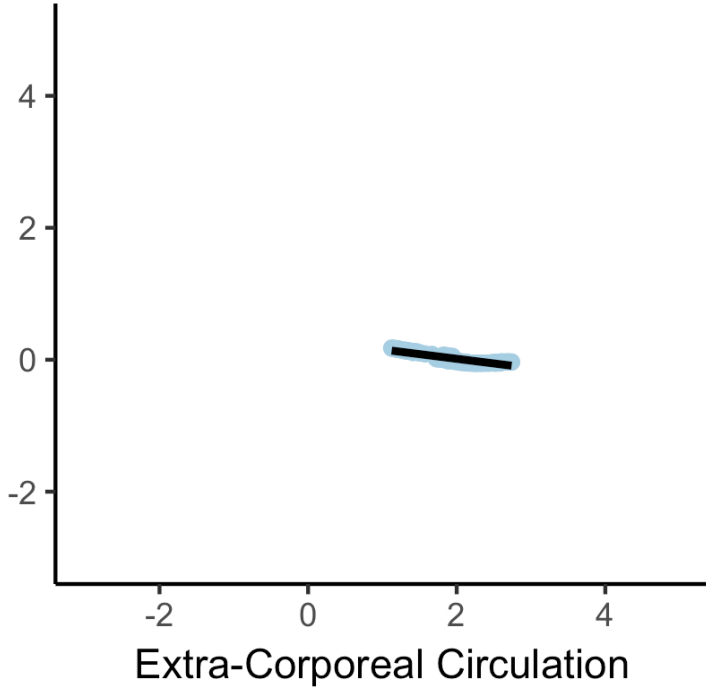

Sensor 2 Patient 1

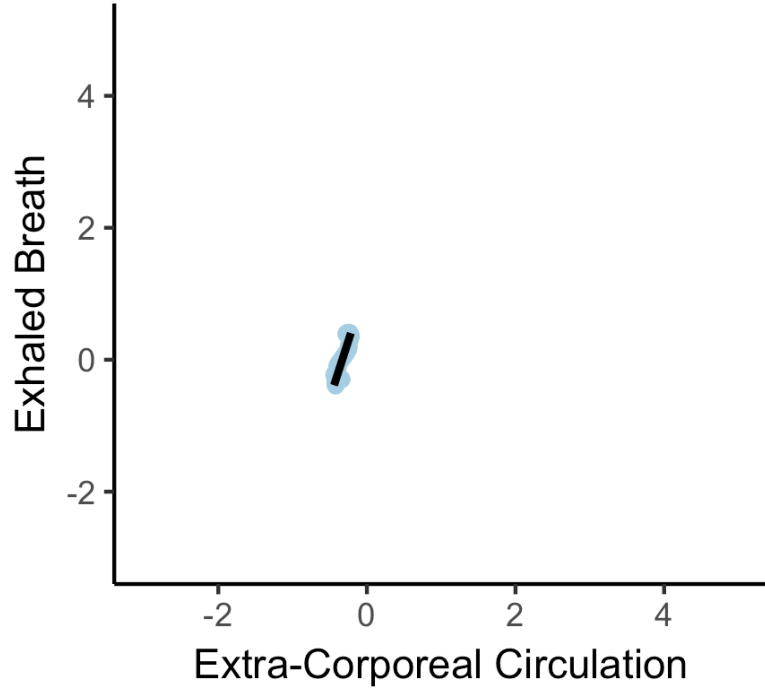

Sensor 3 Patient 1

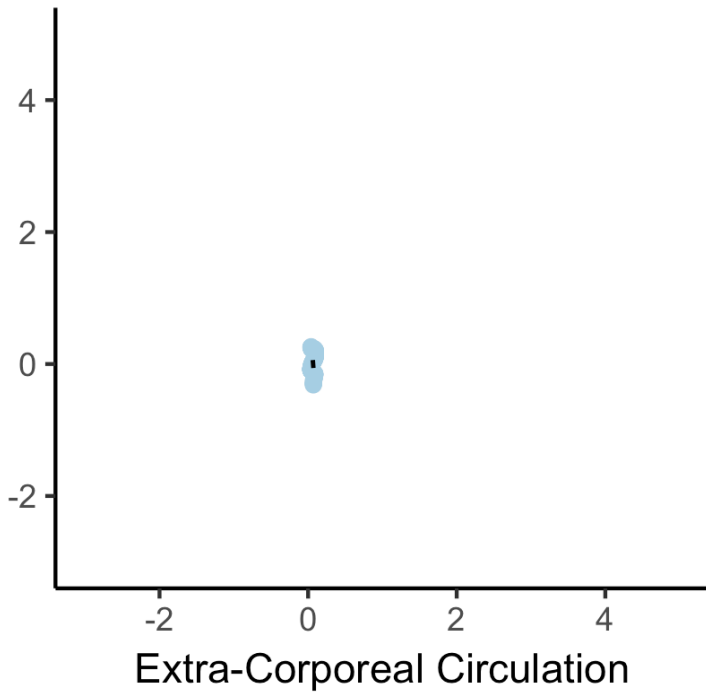

Sensor 4 Patient 1

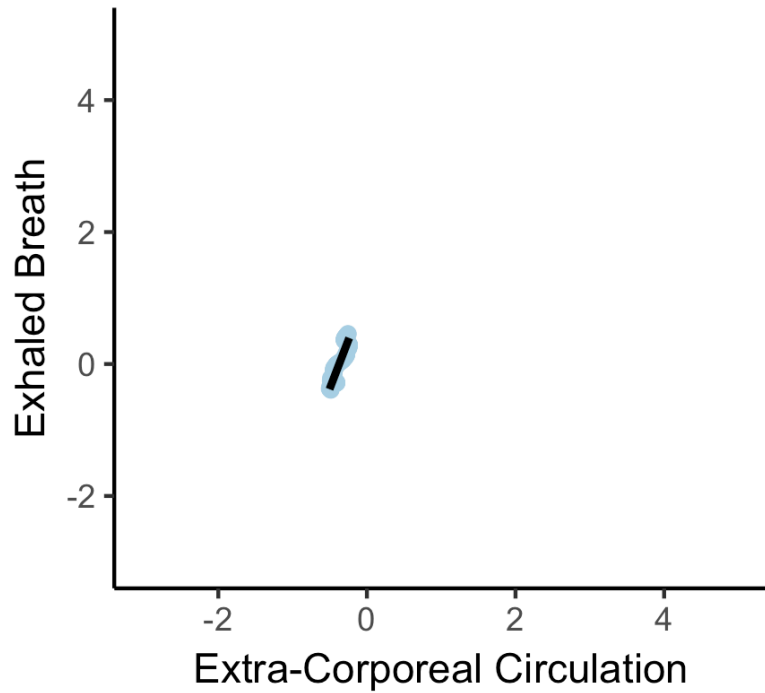

Sensor 1 Patient 2

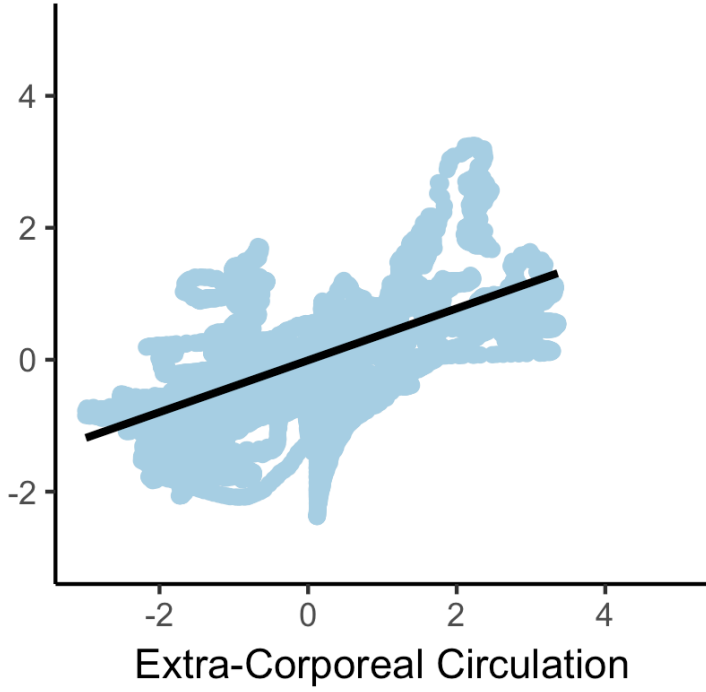

Sensor 2 Patient 2

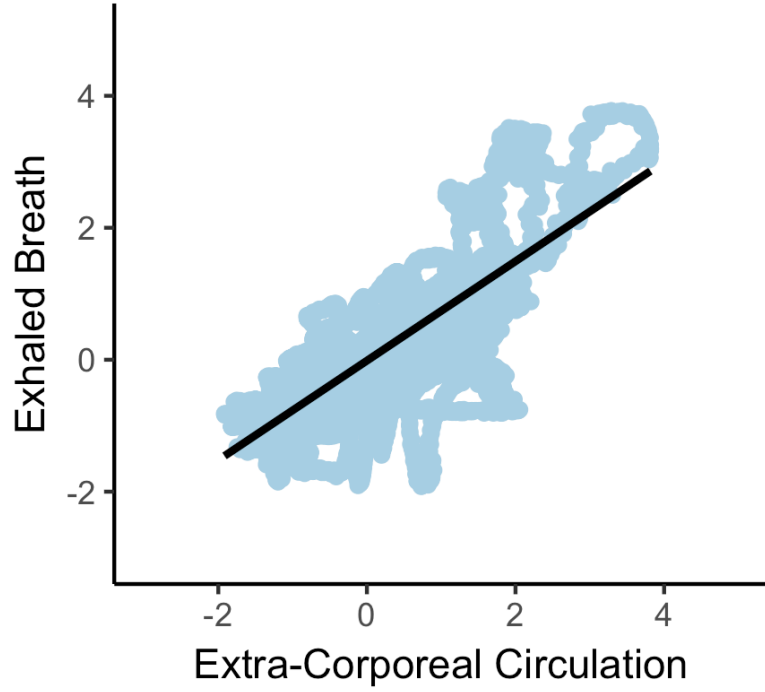

Sensor 3 Patient 2

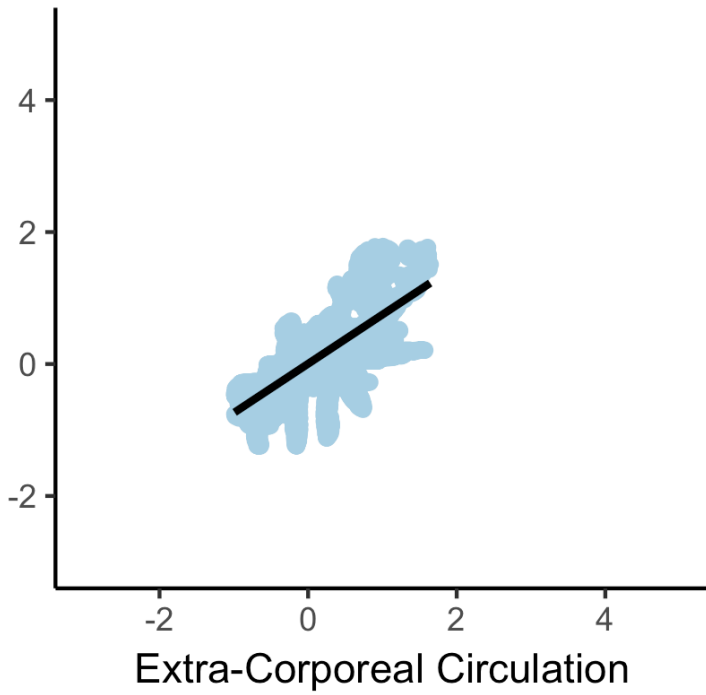

Sensor 4 Patient 2

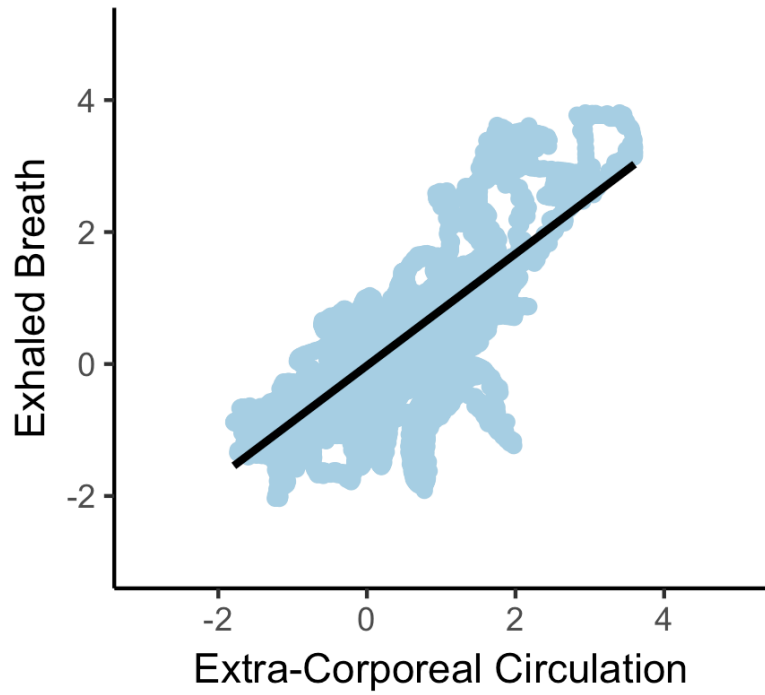

Sensor 1 Patient 3

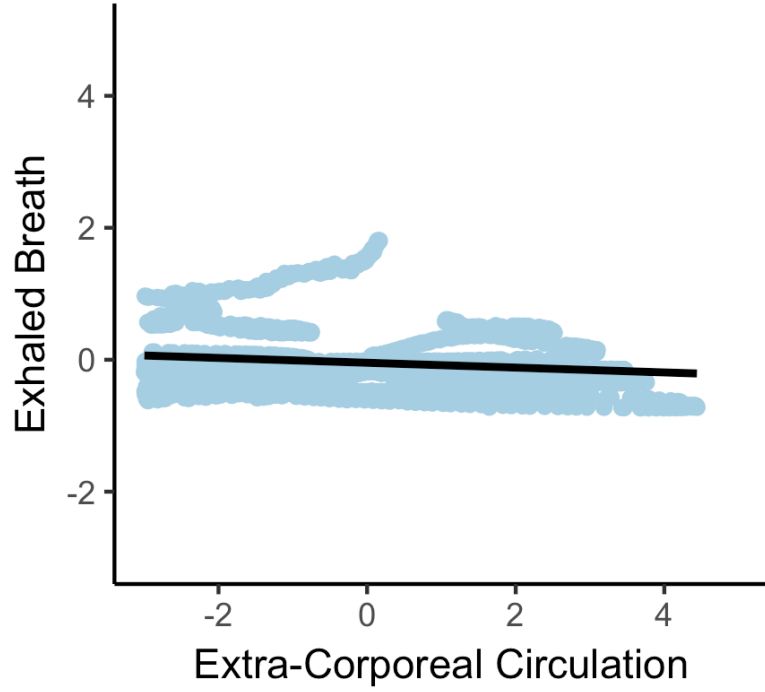

Sensor 2 Patient 3

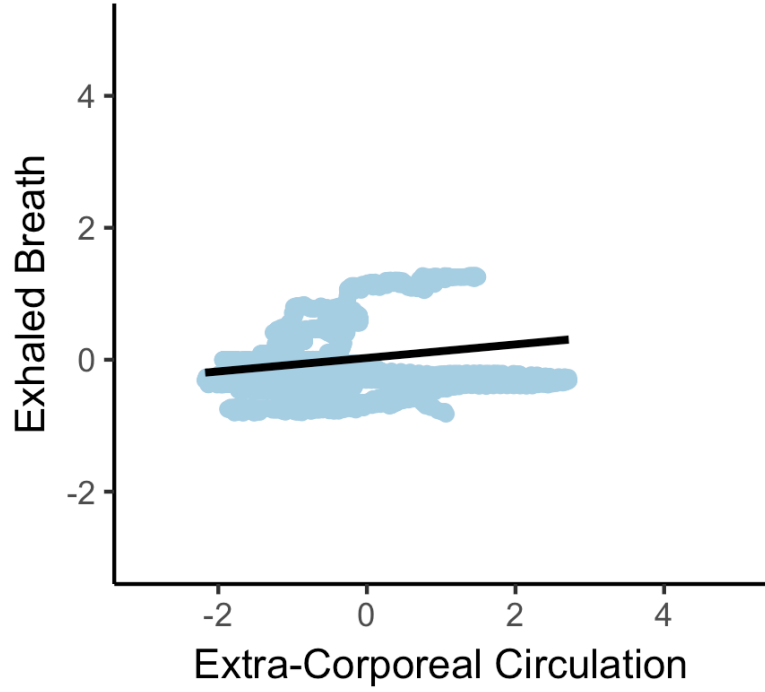

Sensor 3 Patient 3

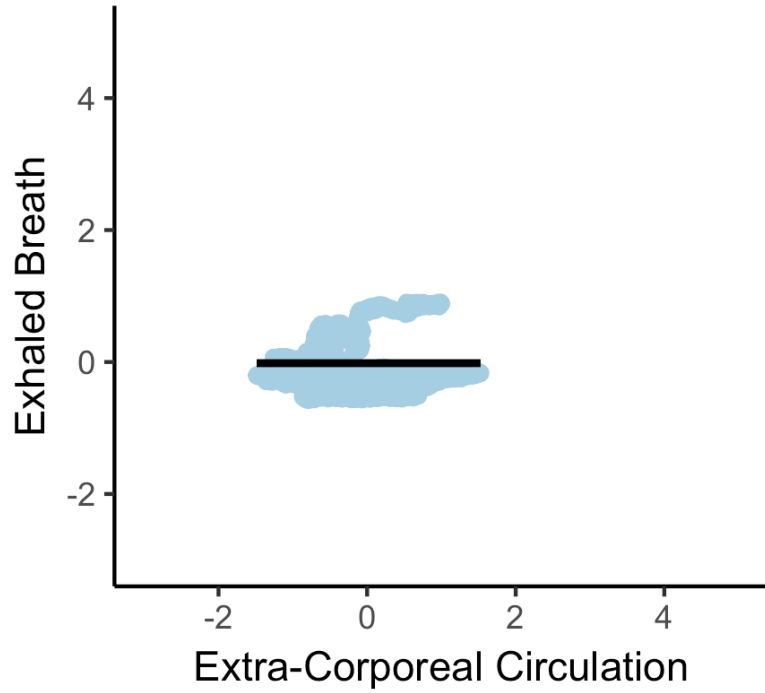

Sensor 4 Patient 3

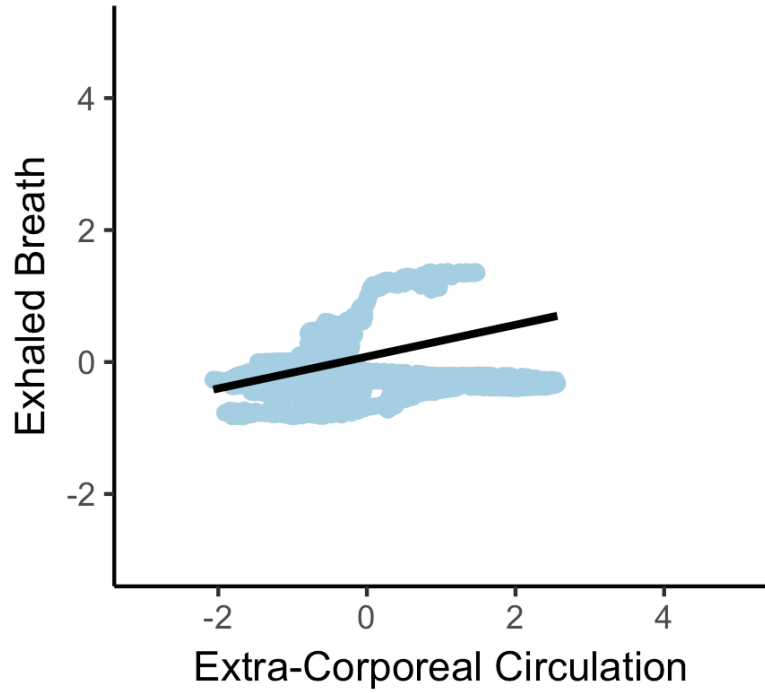

Sensor 1 Patient 4

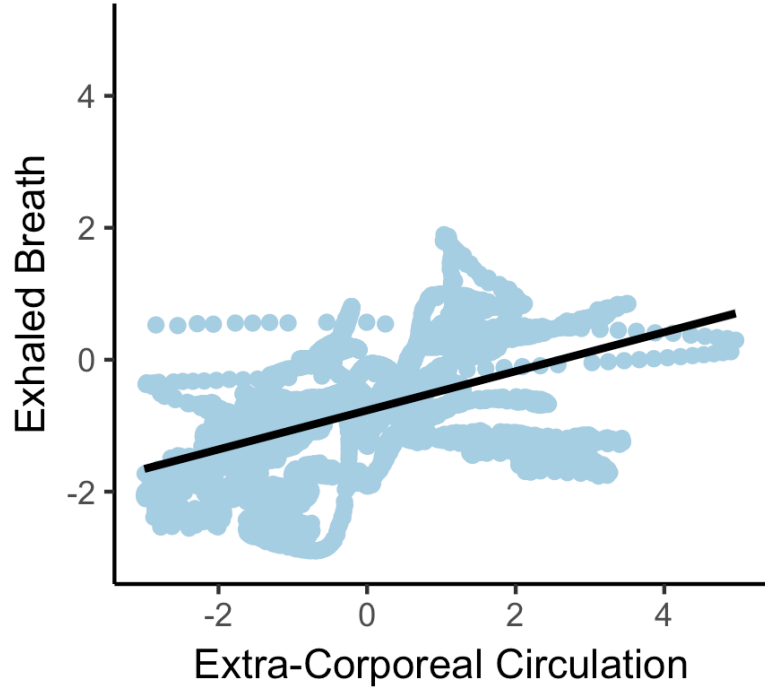

Sensor 2 Patient 4

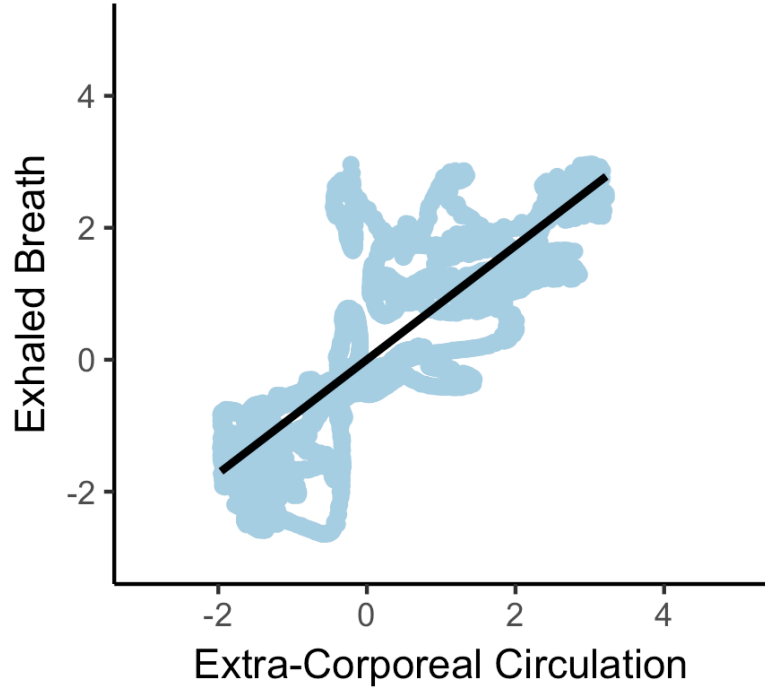

Sensor 3 Patient 4

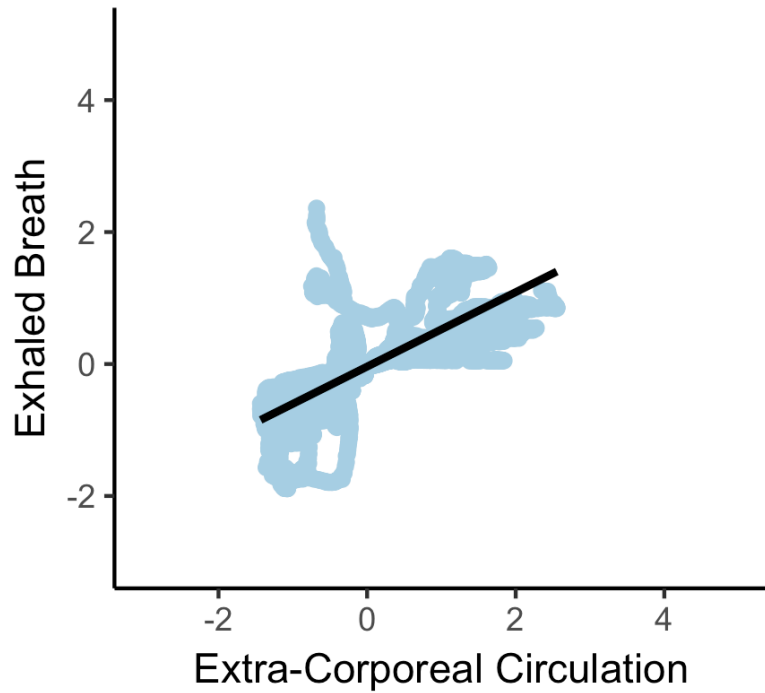

Sensor 4 Patient 4

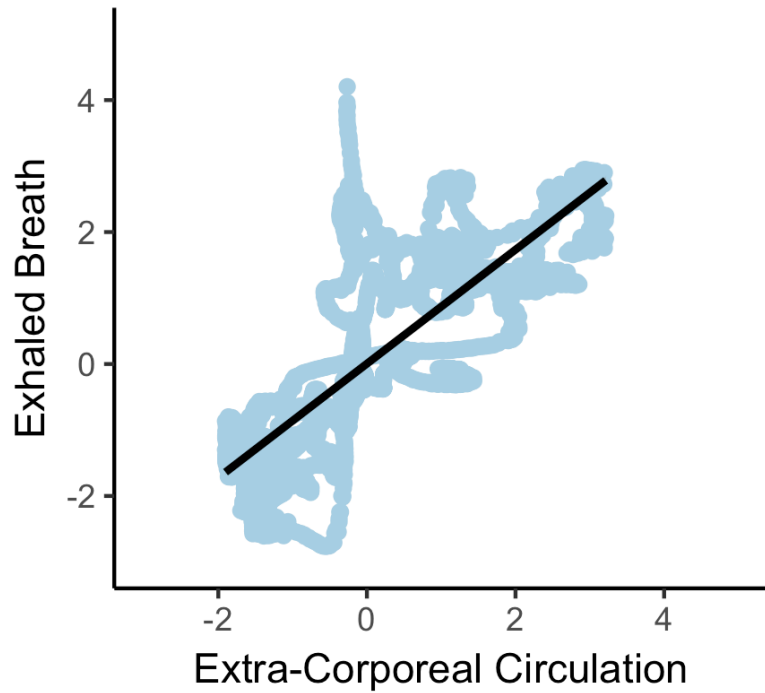

Sensor 1 Patient 5

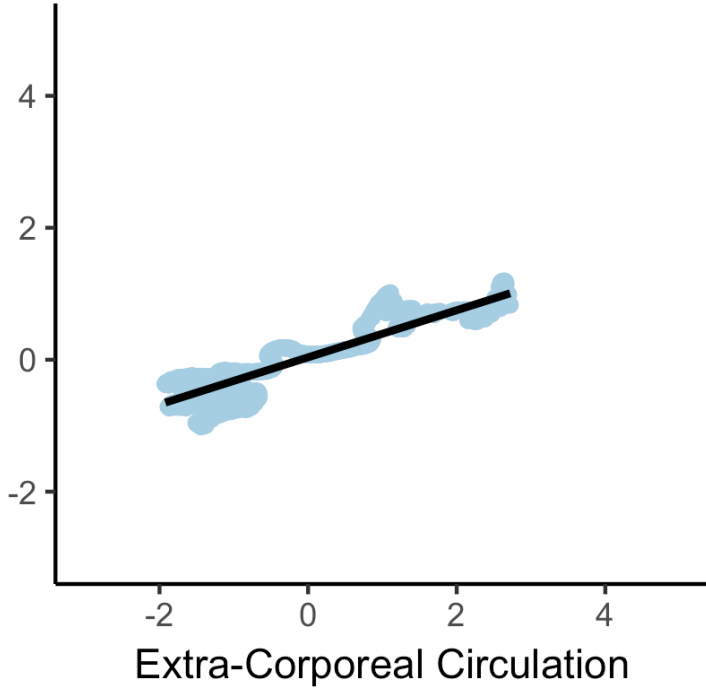

Sensor 2 Patient 5

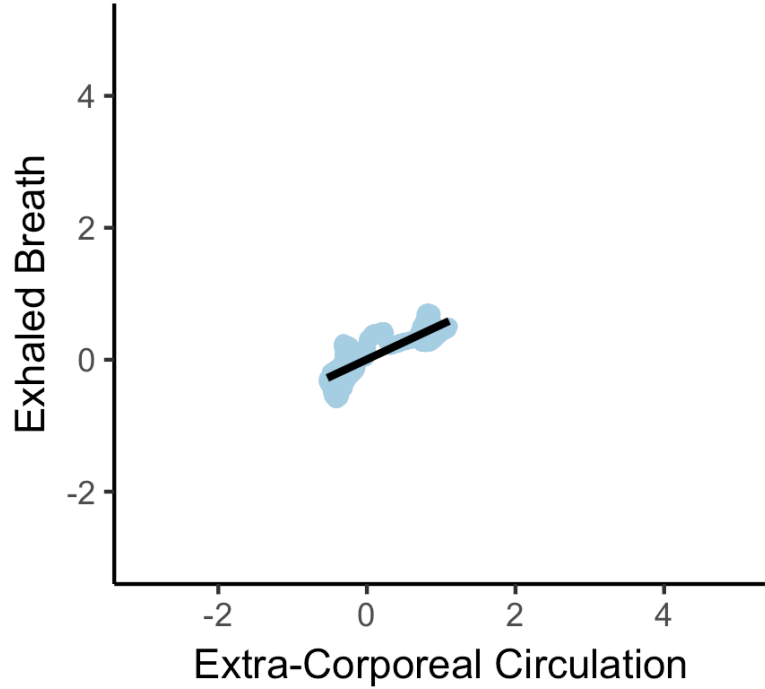

Sensor 3 Patient 5

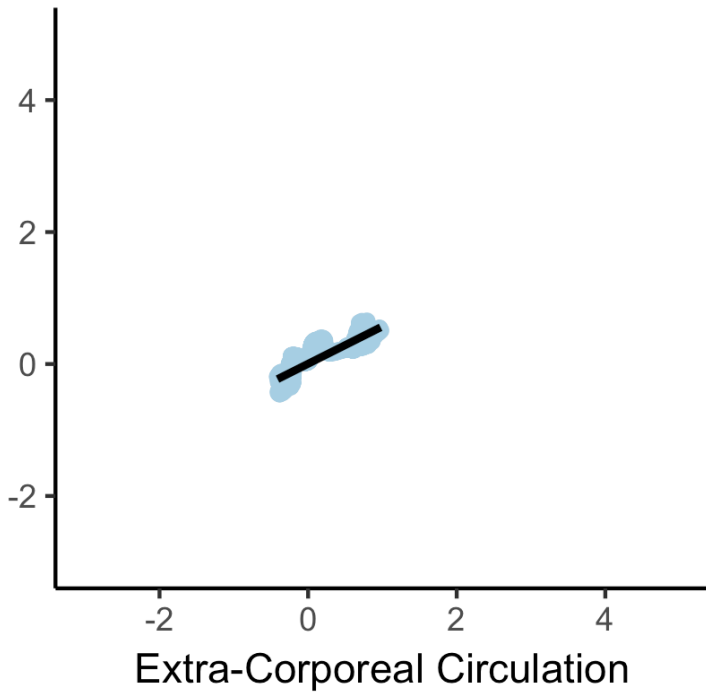

Sensor 4 Patient 5

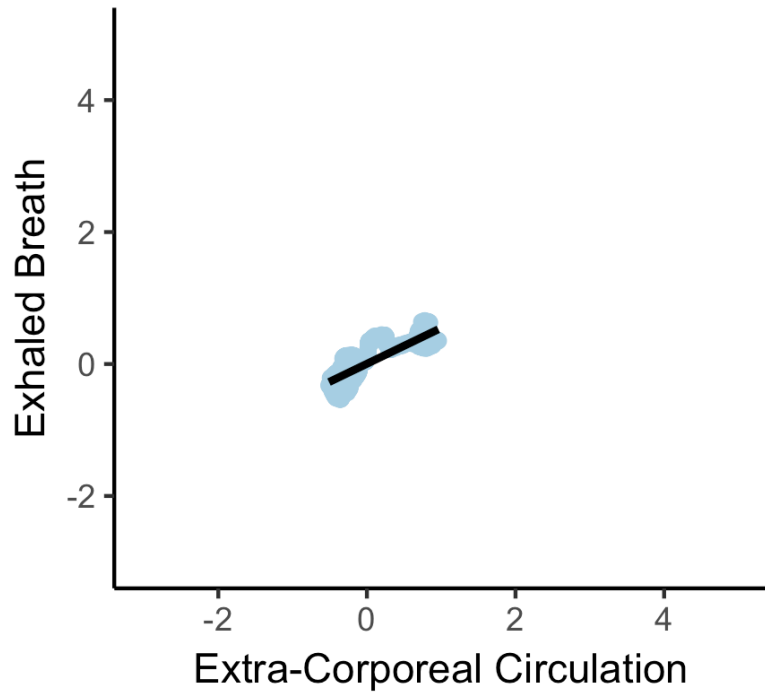

Sensor 1 Patient 6

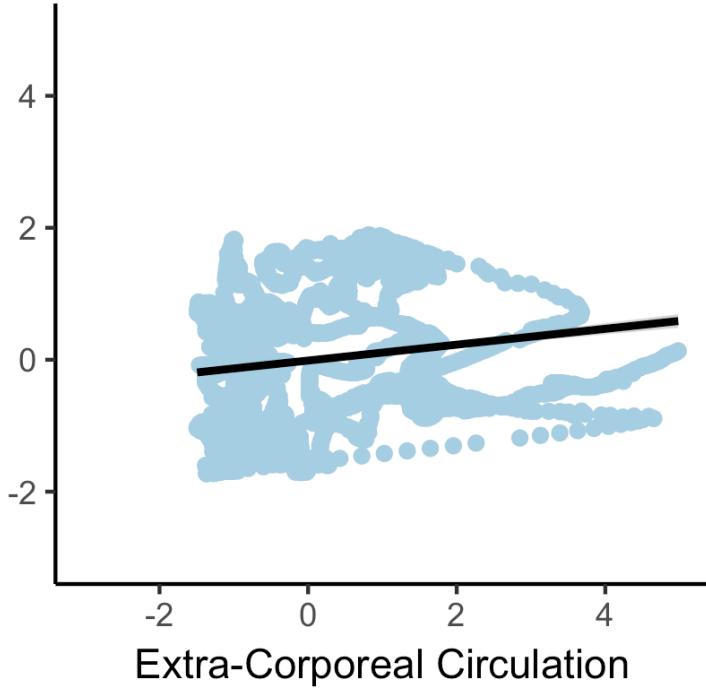

Sensor 2 Patient 6

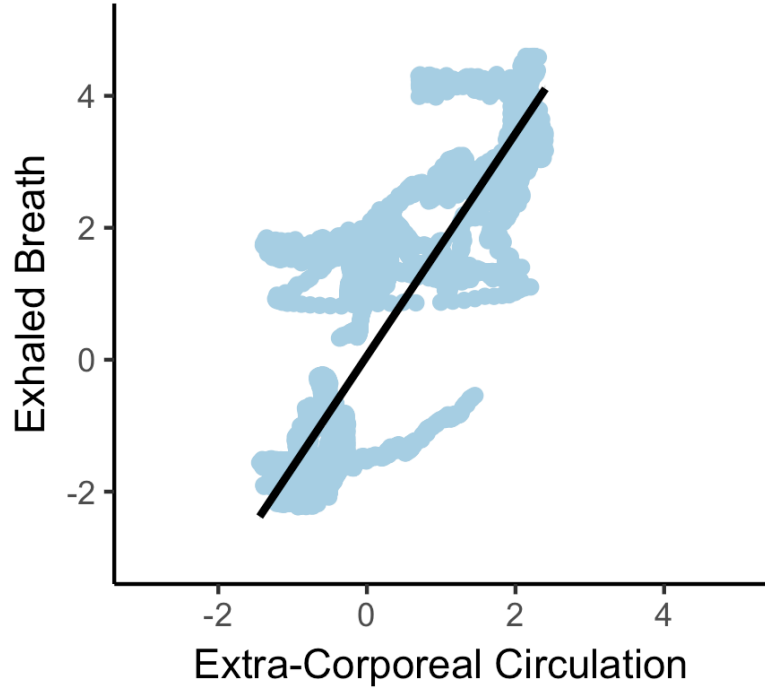

Sensor 3 Patient 6

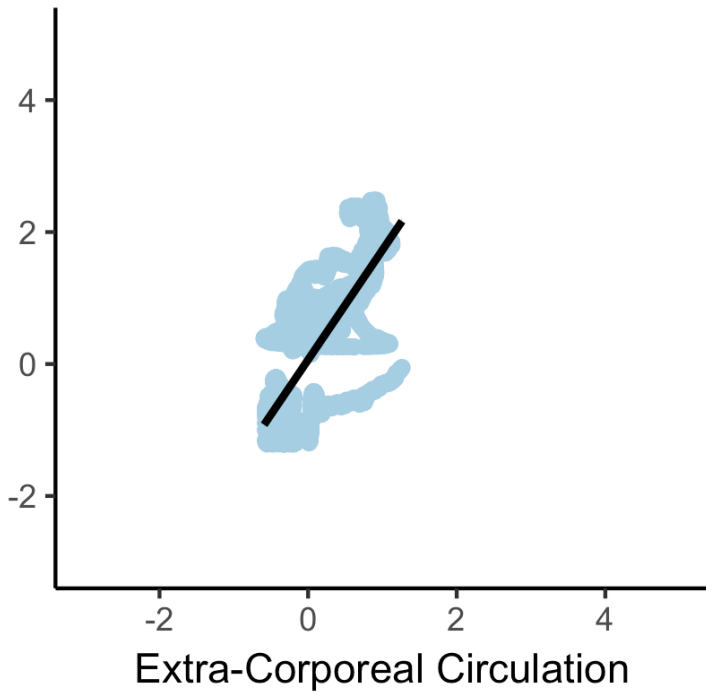

Sensor 4 Patient 6

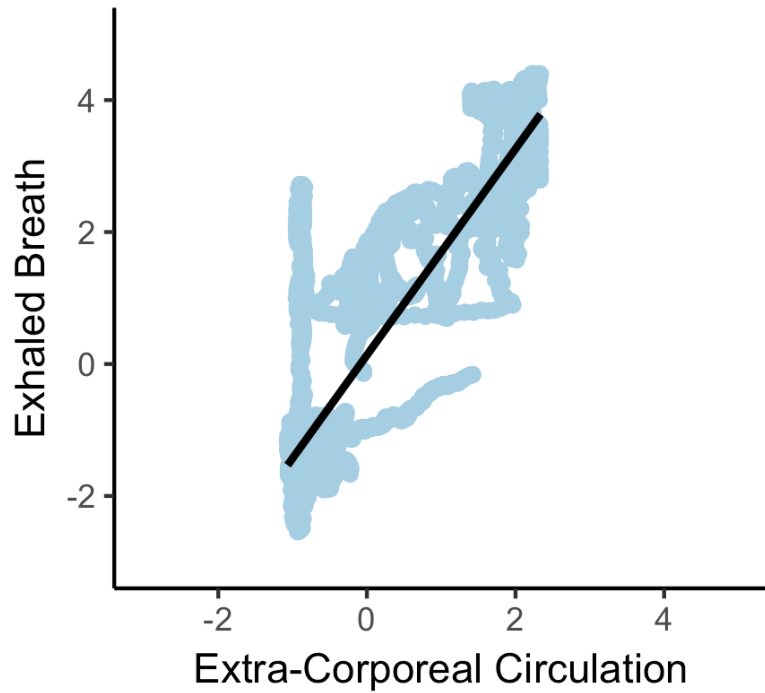

Sensor 1 Patient 7

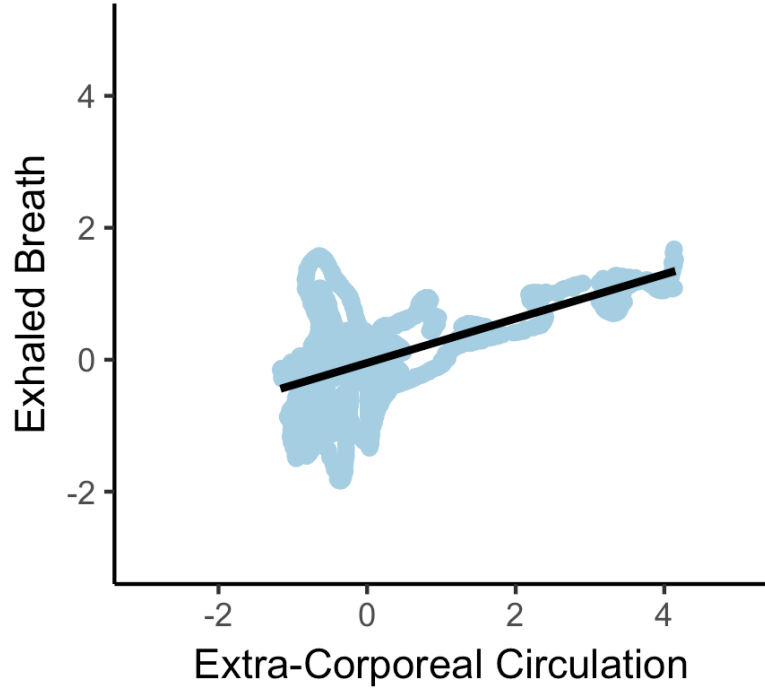

Sensor 2 Patient 7

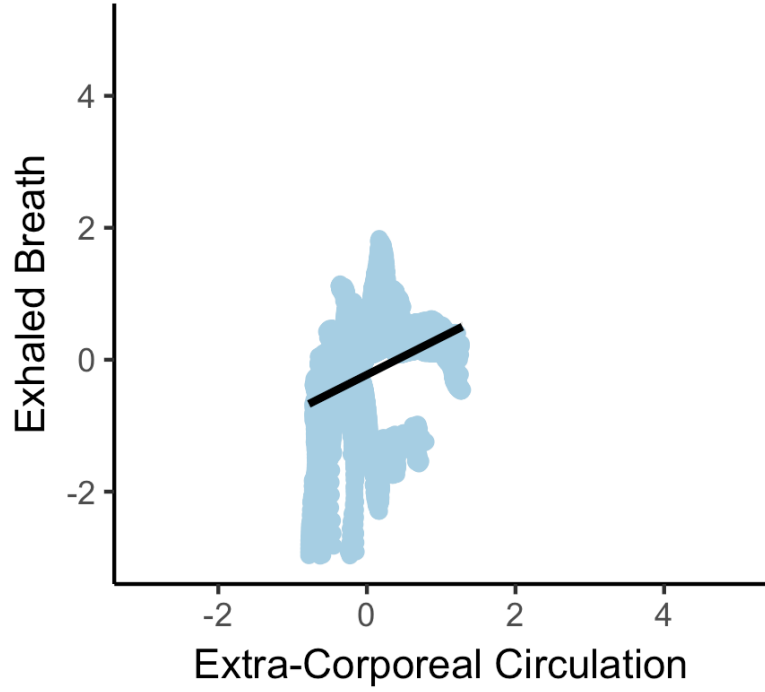

Sensor 3 Patient 7

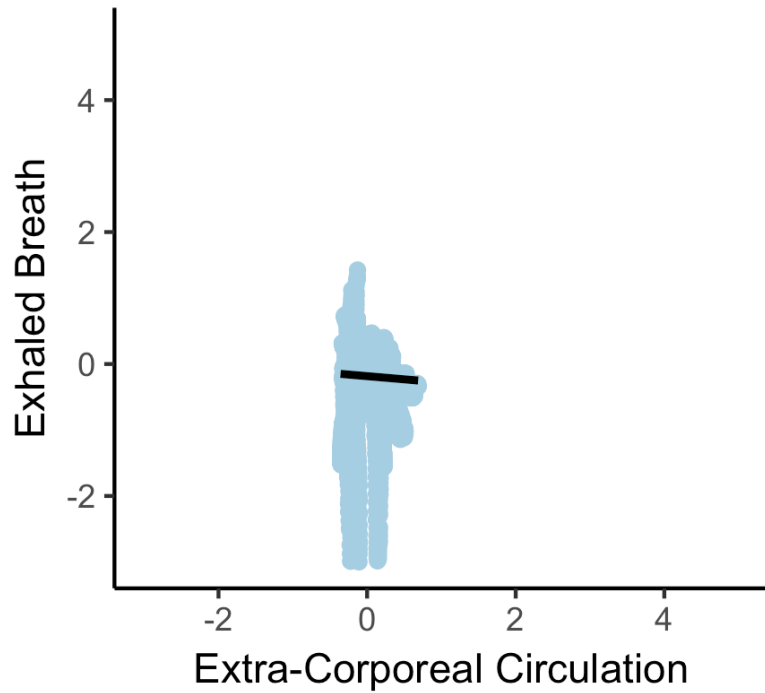

Sensor 4 Patient 7

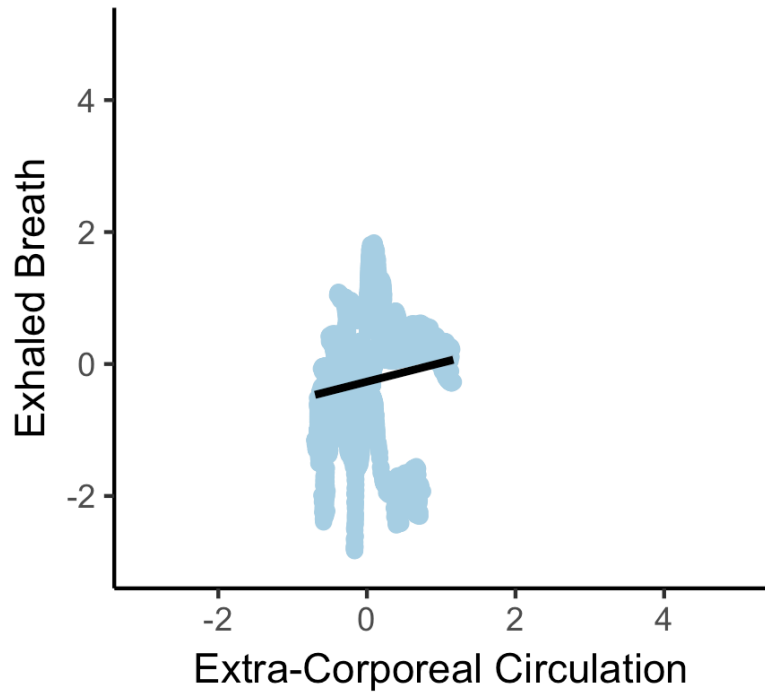

Sensor 1 Patient 8

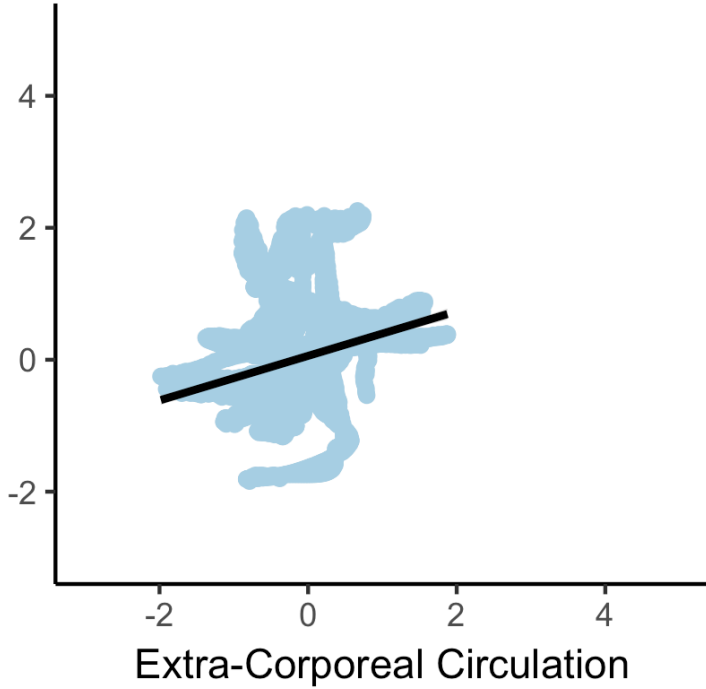

Sensor 2 Patient 8

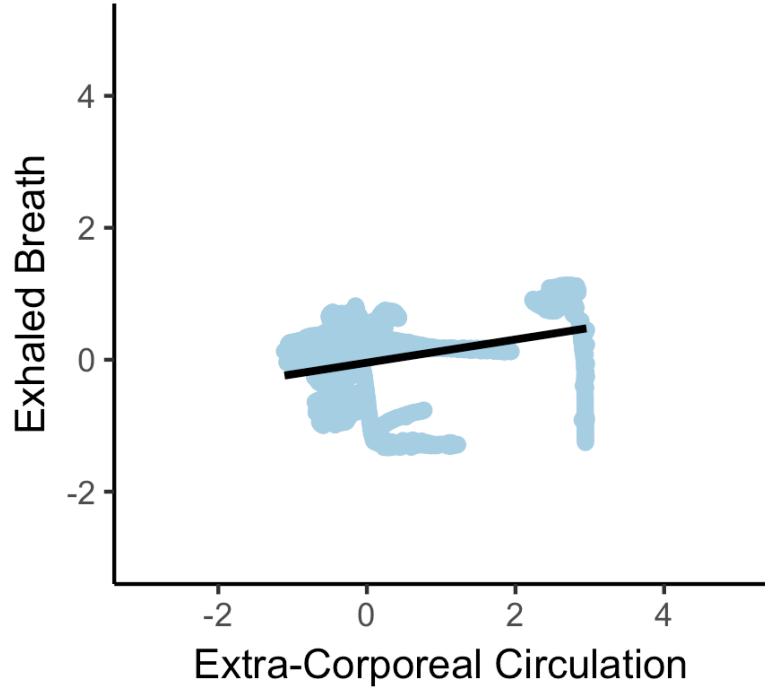

Sensor 3 Patient 8

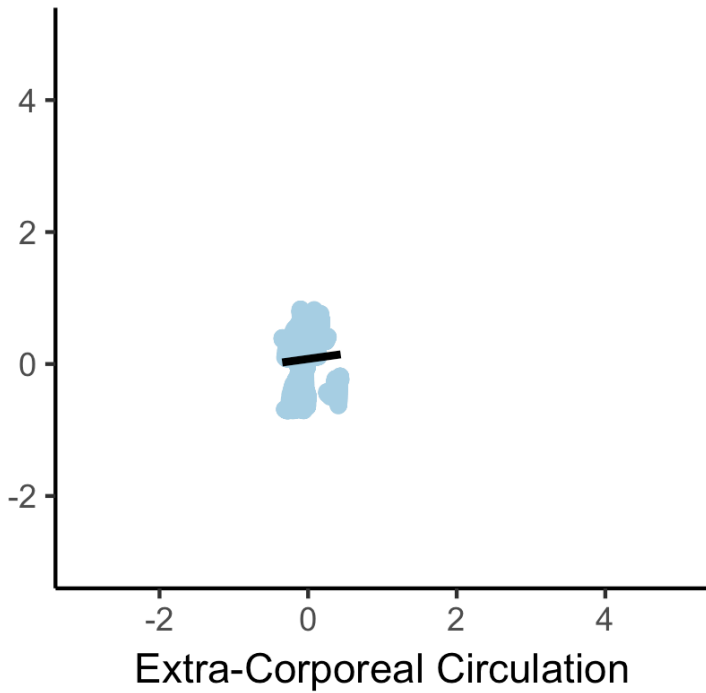

Sensor 4 Patient 8

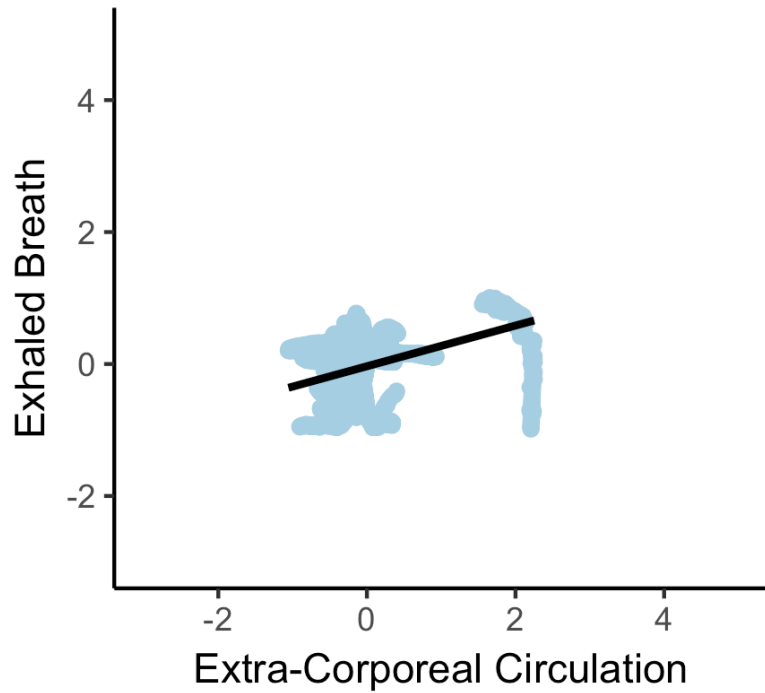



Sensor 1 Patient 9

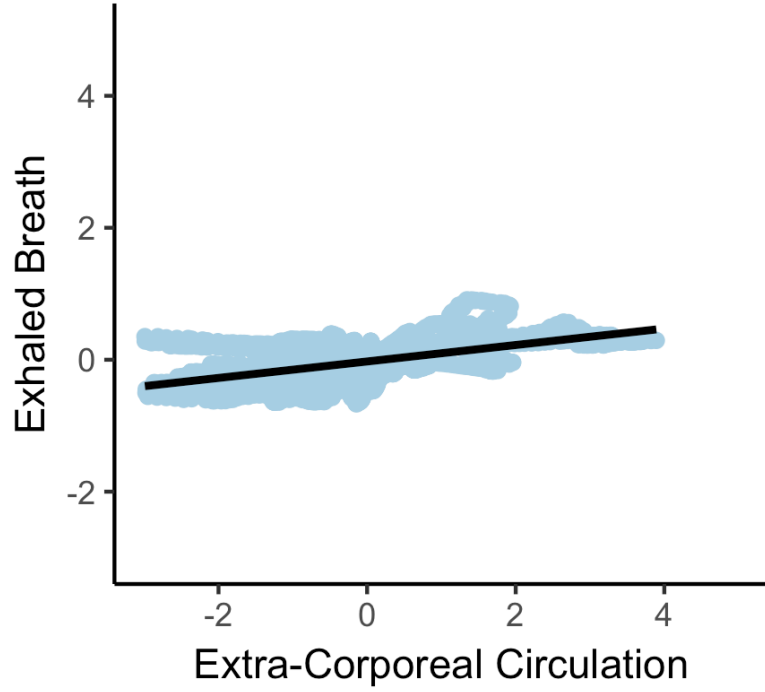

Sensor 2 Patient 9

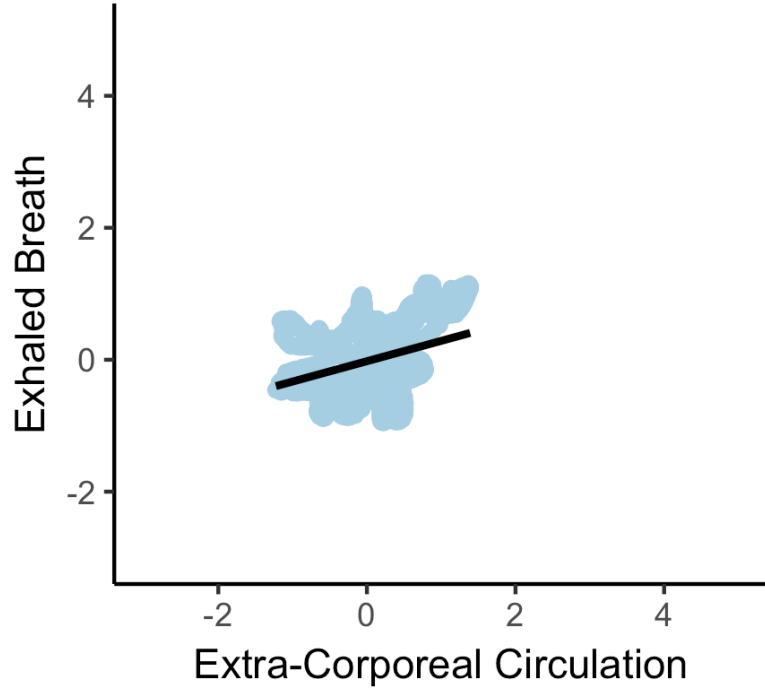

Sensor 3 Patient 9

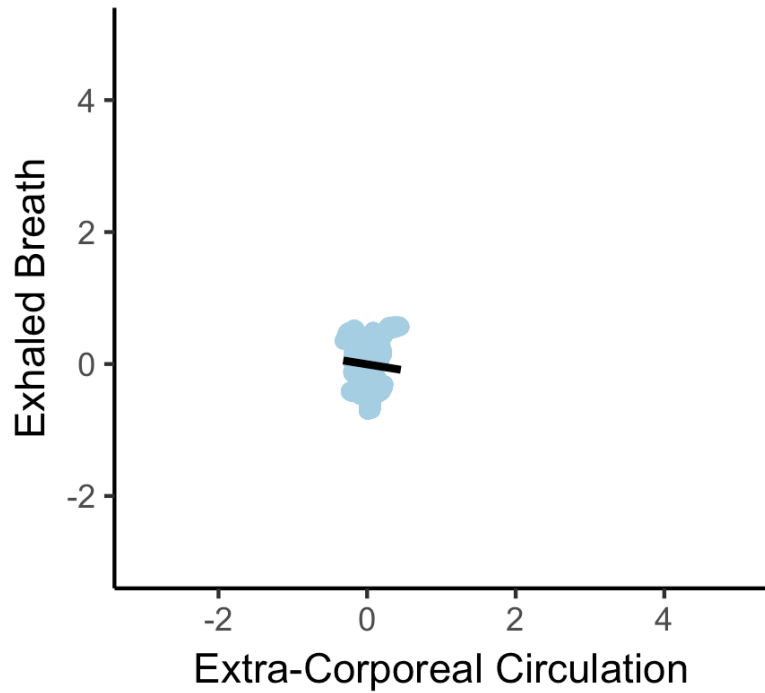

Sensor 4 Patient 9

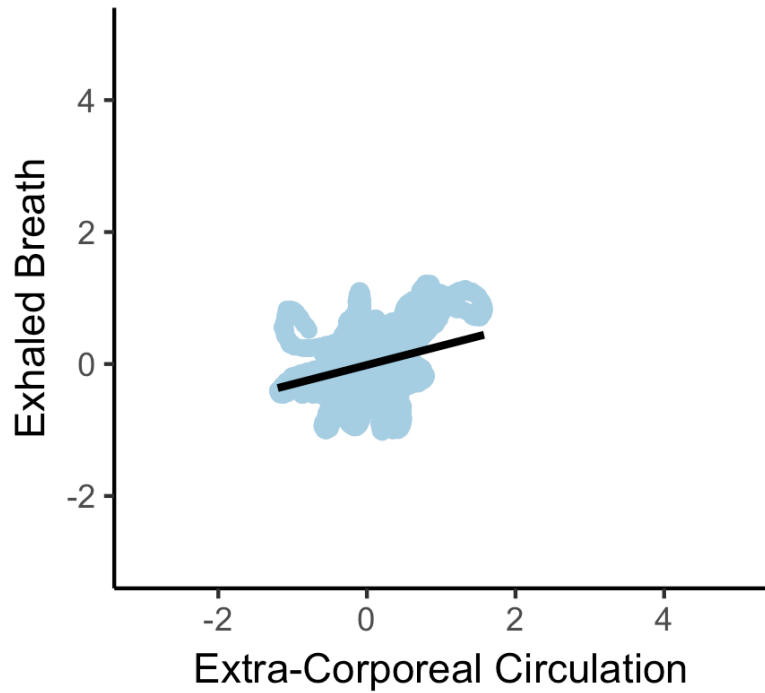

Sensor 1 Patient 10

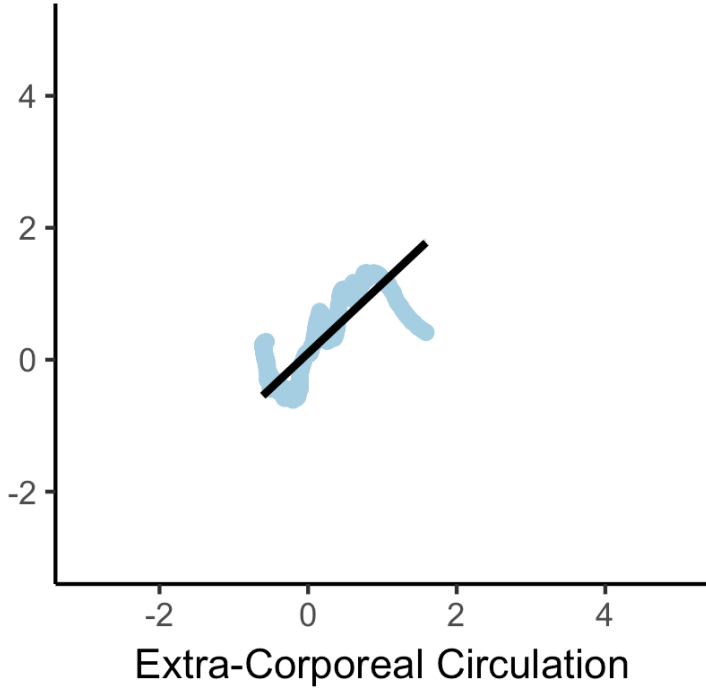

Sensor 2 Patient 10

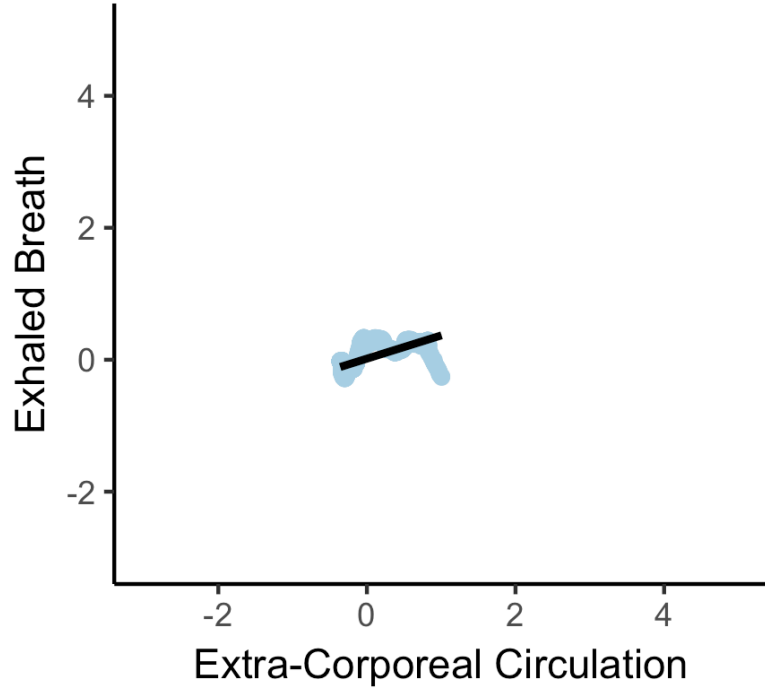

Sensor 3 Patient 10

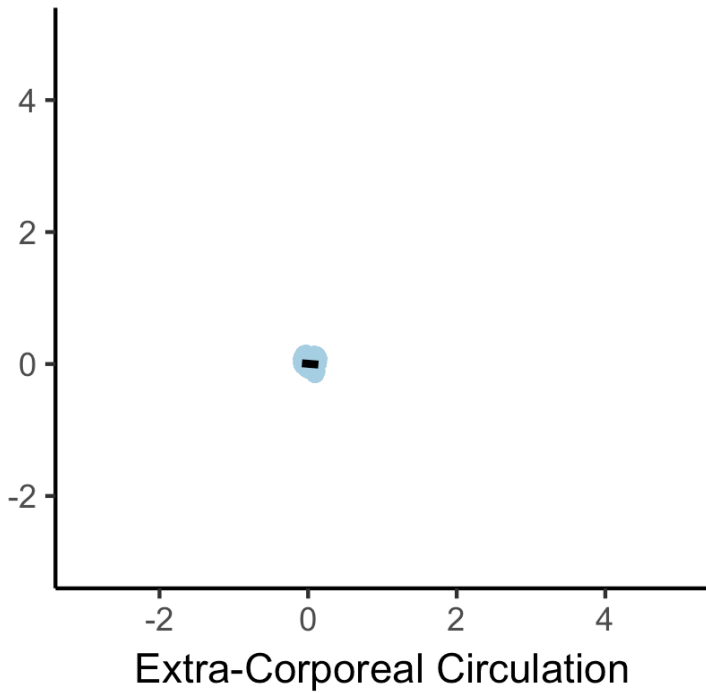

Sensor 4 Patient 10

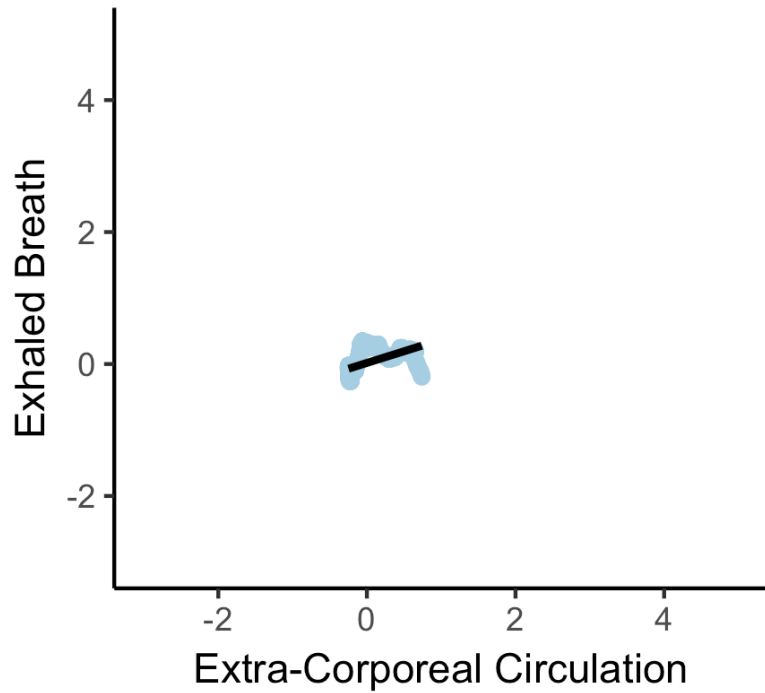

Supplement: inline-supplementary-material-1 [file inline-supplementary-material-1.pdf]
